# Supplementary material
Source: bioRxiv or medRxiv preprint supplement (https://www.biorxiv.org/highwire/filestream/45789/field_highwire_adjunct_files/7/119420-16.pdf)

*B. anthracis* — 128 taxa

*B. cereus* — 258 taxa

*B. mycoides* — 13 taxa

*B. thuringiensis* — 73 taxa

*B. weihenstephanensis* — 6 taxa

*B. wiedmannii* — 11 taxa

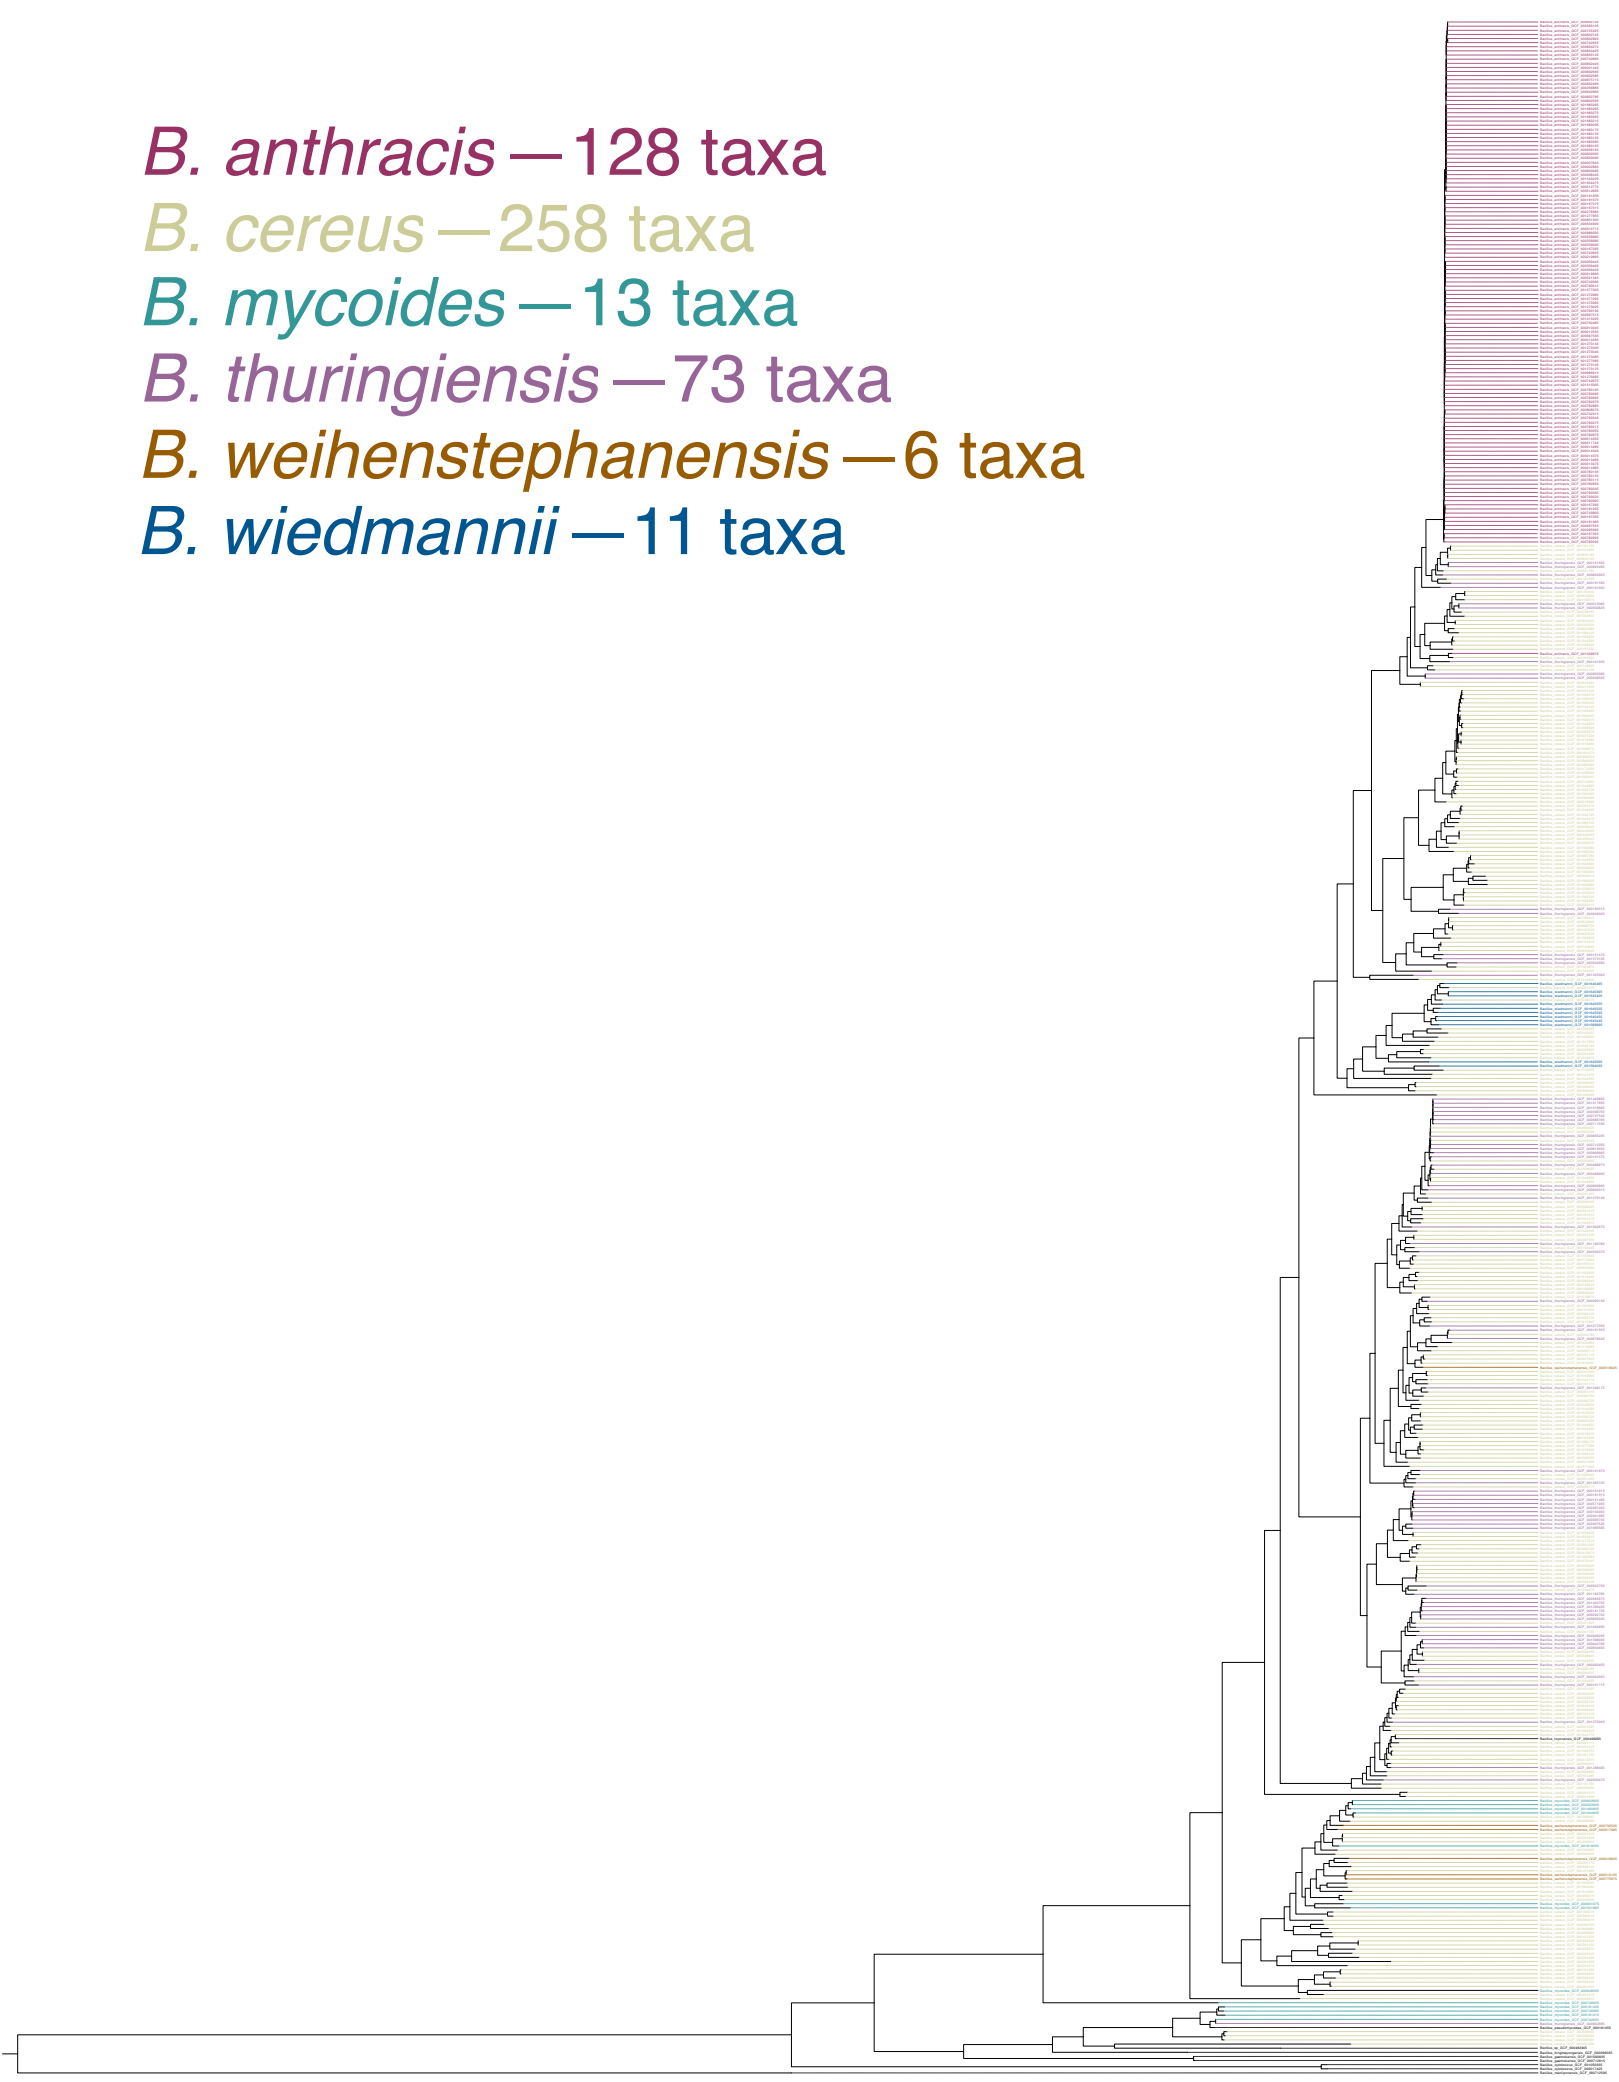

Supplement: Supplementary file [file 119420-16.pdf]
